# Supplementary material
Source: MDPI journal article supplement (https://www.mdpi.com/2071-1050/14/5/3002)
Supplement: s1 [file s1]

Table S1. Agricultural energy consumptions and carbon emissions under different scenarios.

|                | Baseline       |                | Scenario I     |                | Scenario II    |                | Scenario III   |                | Scenario IV    |                |
|----------------|----------------|----------------|----------------|----------------|----------------|----------------|----------------|----------------|----------------|----------------|
|                | En. Con        | Car.Emi        |
| <b>East</b>    | <b>1527.21</b> | <b>3579.64</b> | <b>1559.86</b> | <b>3648.41</b> | <b>1592.21</b> | <b>3716.61</b> | <b>1494.56</b> | <b>3510.87</b> | <b>1463.13</b> | <b>3444.61</b> |
|                |                |                | <b>2.14%</b>   | <b>1.92%</b>   | <b>4.26%</b>   | <b>3.83%</b>   | <b>-2.14%</b>  | <b>-1.92%</b>  | <b>-4.20%</b>  | <b>-3.77%</b>  |
| Anhui          | 376.82         | 797.40         | 385.37         | 815.06         | 393.92         | 832.72         | 368.26         | 779.74         | 359.71         | 762.07         |
|                |                |                | 2.27%          | 2.21%          | 4.54%          | 4.43%          | -2.27%         | -2.21%         | -4.54%         | -4.43%         |
| Fujian         | 36.81          | 76.37          | 37.75          | 78.35          | 38.70          | 80.33          | 35.87          | 74.39          | 35.00          | 72.53          |
|                |                |                | 2.56%          | 2.59%          | 5.12%          | 5.18%          | -2.56%         | -2.59%         | -4.93%         | -5.02%         |
| Jiangsu        | 313.16         | 654.78         | 319.48         | 667.46         | 325.80         | 680.13         | 306.84         | 642.11         | 300.52         | 629.43         |
|                |                |                | 2.02%          | 1.94%          | 4.04%          | 3.87%          | -2.02%         | -1.94%         | -4.04%         | -3.87%         |
| Jiangxi        | 195.68         | 396.90         | 200.56         | 407.03         | 205.44         | 417.16         | 190.80         | 386.77         | 185.92         | 376.64         |
|                |                |                | 2.49%          | 2.55%          | 4.99%          | 5.10%          | -2.49%         | -2.55%         | -4.99%         | -5.10%         |
| Shandong       | 506.81         | 1448.46        | 516.45         | 1470.03        | 526.10         | 1491.59        | 497.16         | 1426.89        | 487.51         | 1405.32        |
|                |                |                | 1.90%          | 1.49%          | 3.81%          | 2.98%          | -1.90%         | -1.49%         | -3.81%         | -2.98%         |
| Shanghai       | 11.78          | 28.53          | 12.00          | 28.99          | 12.22          | 29.44          | 11.56          | 28.07          | 11.34          | 27.62          |
|                |                |                | 1.87%          | 1.60%          | 3.74%          | 3.20%          | -1.87%         | -1.60%         | -3.74%         | -3.20%         |
| Zhejiang       | 86.16          | 177.20         | 88.25          | 181.50         | 90.02          | 185.23         | 84.07          | 172.90         | 83.14          | 170.98         |
|                |                |                | 2.42%          | 2.43%          | 4.49%          | 4.53%          | -2.42%         | -2.43%         | -3.51%         | -3.51%         |
| <b>North</b>   | <b>874.76</b>  | <b>2594.70</b> | <b>890.54</b>  | <b>2630.12</b> | <b>906.32</b>  | <b>2665.55</b> | <b>858.98</b>  | <b>2559.27</b> | <b>843.20</b>  | <b>2523.84</b> |
|                |                |                | <b>1.80%</b>   | <b>1.37%</b>   | <b>3.61%</b>   | <b>2.73%</b>   | <b>-1.80%</b>  | <b>-1.37%</b>  | <b>-3.61%</b>  | <b>-2.73%</b>  |
| Beijing        | 8.37           | 25.60          | 8.52           | 25.95          | 8.67           | 26.29          | 8.21           | 25.26          | 8.06           | 24.91          |
|                |                |                | 1.81%          | 1.34%          | 3.62%          | 2.69%          | -1.81%         | -1.34%         | -3.62%         | -2.69%         |
| Hebei          | 391.24         | 1233.80        | 397.90         | 1249.08        | 404.56         | 1264.36        | 384.58         | 1218.52        | 377.93         | 1203.24        |
|                |                |                | 1.70%          | 1.24%          | 3.40%          | 2.48%          | -1.70%         | -1.24%         | -3.40%         | -2.48%         |
| Inner-Mongolia | 294.66         | 753.73         | 300.63         | 766.54         | 306.59         | 779.35         | 288.70         | 740.92         | 282.74         | 728.11         |
|                |                |                | 2.02%          | 1.70%          | 4.05%          | 3.40%          | -2.02%         | -1.70%         | -4.05%         | -3.40%         |
| Shanxi         | 162.97         | 527.01         | 165.67         | 533.30         | 168.37         | 539.59         | 160.27         | 520.71         | 157.57         | 514.42         |
|                |                |                | 1.66%          | 1.19%          | 3.31%          | 2.39%          | -1.66%         | -1.19%         | -3.31%         | -2.39%         |
| Tianjin        | 17.51          | 54.56          | 17.82          | 55.26          | 18.13          | 55.96          | 17.21          | 53.86          | 16.90          | 53.16          |
|                |                |                | 1.75%          | 1.28%          | 3.50%          | 2.56%          | -1.75%         | -1.28%         | -3.50%         | -2.56%         |
| <b>South</b>   | <b>462.65</b>  | <b>861.94</b>  | <b>462.91</b>  | <b>864.42</b>  | <b>462.88</b>  | <b>866.35</b>  | <b>461.98</b>  | <b>858.57</b>  | <b>460.35</b>  | <b>852.72</b>  |
| <b>-west</b>   |                |                | <b>0.06%</b>   | <b>0.29%</b>   | <b>0.05%</b>   | <b>0.51%</b>   | <b>-0.14%</b>  | <b>-0.39%</b>  | <b>-0.50%</b>  | <b>-1.07%</b>  |
| Chong-qing     | 62.22          | 119.57         | 63.71          | 122.60         | 65.19          | 125.63         | 60.74          | 116.54         | 59.26          | 113.51         |
|                |                |                | 2.38%          | 2.53%          | 4.77%          | 5.07%          | -2.38%         | -2.53%         | -4.77%         | -5.07%         |
| Guizhou        | 79.14          | 143.55         | 80.83          | 146.85         | 82.51          | 150.14         | 78.86          | 142.58         | 85.35          | 152.79         |
|                |                |                | 2.13%          | 2.29%          | 4.26%          | 4.59%          | -0.36%         | -0.67%         | 7.84%          | 6.43%          |
| Sichuang       | 185.11         | 346.25         | 189.11         | 354.23         | 193.11         | 362.21         | 181.10         | 338.27         | 177.10         | 330.29         |
|                |                |                | 2.16%          | 2.30%          | 4.32%          | 4.61%          | -2.16%         | -2.30%         | -4.32%         | -4.61%         |
| Tibet          | 1.70           | 3.13           | 1.74           | 3.21           | 1.78           | 3.29           | 1.66           | 3.05           | 1.62           | 2.97           |
|                |                |                | 2.37%          | 2.57%          | 4.73%          | 5.15%          | -2.37%         | -2.57%         | -4.73%         | -5.15%         |
| Yunnan         | 134.48         | 249.44         | 127.53         | 237.54         | 120.29         | 225.08         | 139.62         | 258.14         | 137.02         | 253.17         |
|                |                |                | -5.17%         | -4.77%         | -10.55%        | -9.76%         | 3.82%          | 3.49%          | 1.89%          | 1.49%          |
| <b>Nouth</b>   | <b>524.56</b>  | <b>1559.23</b> | <b>524.65</b>  | <b>1549.86</b> | <b>524.48</b>  | <b>1539.93</b> | <b>524.28</b>  | <b>1568.18</b> | <b>518.89</b>  | <b>1560.23</b> |
| <b>-west</b>   |                |                | <b>0.02%</b>   | <b>-0.60%</b>  | <b>-0.01%</b>  | <b>-1.24%</b>  | <b>-0.05%</b>  | <b>0.57%</b>   | <b>-1.08%</b>  | <b>0.06%</b>   |
| Gansu          | 114.29         | 265.08         | 116.61         | 270.00         | 118.93         | 274.90         | 111.96         | 260.15         | 109.63         | 255.23         |
|                |                |                | 2.04%          | 1.86%          | 4.06%          | 3.70%          | -2.04%         | -1.86%         | -4.07%         | -3.71%         |
| Ningxia        | 29.16          | 53.08          | 29.82          | 54.39          | 30.48          | 55.69          | 28.50          | 51.77          | 27.84          | 50.46          |
|                |                |                | 2.26%          | 2.47%          | 4.52%          | 4.93%          | -2.26%         | -2.47%         | -4.52%         | -4.93%         |
| Qinghai        | 8.36           | 16.07          | 8.57           | 16.49          | 8.77           | 16.91          | 8.16           | 15.65          | 7.95           | 15.23          |
|                |                |                | 2.44%          | 2.61%          | 4.89%          | 5.22%          | -2.44%         | -2.61%         | -4.89%         | -5.22%         |
| Shaanxi        | 182.87         | 591.77         | 185.70         | 598.24         | 188.52         | 604.72         | 180.04         | 585.29         | 177.21         | 578.82         |
|                |                |                | 1.55%          | 1.09%          | 3.09%          | 2.19%          | -1.55%         | -1.09%         | -3.09%         | -2.19%         |
| Xinjiang       | 189.89         | 633.24         | 183.95         | 610.74         | 177.78         | 587.72         | 195.62         | 655.32         | 196.26         | 660.48         |
|                |                |                | -3.13%         | -3.55%         | -6.38%         | -7.19%         | 3.02%          | 3.49%          | 3.36%          | 4.30%          |
| <b>South</b>   | <b>258.93</b>  | <b>511.84</b>  | <b>265.36</b>  | <b>525.08</b>  | <b>271.79</b>  | <b>538.32</b>  | <b>252.49</b>  | <b>498.59</b>  | <b>246.06</b>  | <b>485.35</b>  |
|                |                |                | <b>2.48%</b>   | <b>2.59%</b>   | <b>4.97%</b>   | <b>5.17%</b>   | <b>-2.48%</b>  | <b>-2.59%</b>  | <b>-4.97%</b>  | <b>-5.17%</b>  |
| Guangdong      | 120.50         | 245.58         | 123.55         | 251.92         | 126.59         | 258.25         | 117.45         | 239.25         | 114.41         | 232.91         |
|                |                |                | 2.53%          | 2.58%          | 5.06%          | 5.16%          | -2.53%         | -2.58%         | -5.06%         | -5.16%         |
| Guangxi        | 120.36         | 231.02         | 123.24         | 236.87         | 126.11         | 242.72         | 117.48         | 225.17         | 114.60         | 219.32         |

|                   |                |                 |                |                 |                |                 |                |                 |                |                 |
|-------------------|----------------|-----------------|----------------|-----------------|----------------|-----------------|----------------|-----------------|----------------|-----------------|
|                   |                |                 | 2.39%          | 2.53%           | 4.78%          | 5.06%           | -2.39%         | -2.53%          | -4.78%         | -5.06%          |
| Hainan            | 18.07          | 35.24           | 18.58          | 36.29           | 19.09          | 37.35           | 17.56          | 34.18           | 17.05          | 33.12           |
|                   |                |                 | 2.82%          | 3.00%           | 5.64%          | 6.01%           | -2.82%         | -3.00%          | -5.64%         | -6.01%          |
| <b>Central</b>    | <b>1039.02</b> | <b>2261.27</b>  | <b>1063.40</b> | <b>2312.34</b>  | <b>1087.78</b> | <b>2363.41</b>  | <b>1014.63</b> | <b>2210.20</b>  | <b>992.68</b>  | <b>2163.77</b>  |
|                   |                |                 | <b>2.35%</b>   | <b>2.26%</b>    | <b>4.69%</b>   | <b>4.52%</b>    | <b>-2.35%</b>  | <b>-2.26%</b>   | <b>-4.46%</b>  | <b>-4.31%</b>   |
| Henan             | 525.54         | 1194.45         | 537.20         | 1219.04         | 548.86         | 1243.63         | 513.88         | 1169.87         | 502.23         | 1145.28         |
|                   |                |                 | 2.22%          | 2.06%           | 4.44%          | 4.12%           | -2.22%         | -2.06%          | -4.44%         | -4.12%          |
| Hubei             | 257.40         | 552.30          | 263.39         | 564.79          | 269.39         | 577.28          | 251.41         | 539.82          | 245.42         | 527.33          |
|                   |                |                 | 2.33%          | 2.26%           | 4.66%          | 4.52%           | -2.33%         | -2.26%          | -4.66%         | -4.52%          |
| Hunan             | 256.08         | 514.51          | 262.81         | 528.51          | 269.54         | 542.50          | 249.34         | 500.52          | 245.04         | 491.16          |
|                   |                |                 | 2.63%          | 2.72%           | 5.26%          | 5.44%           | -2.63%         | -2.72%          | -4.31%         | -4.54%          |
| <b>North-east</b> | <b>948.16</b>  | <b>2342.66</b>  | <b>958.26</b>  | <b>2357.46</b>  | <b>967.89</b>  | <b>2371.24</b>  | <b>937.60</b>  | <b>2326.88</b>  | <b>924.36</b>  | <b>2304.67</b>  |
|                   |                |                 | <b>1.07%</b>   | <b>0.63%</b>    | <b>2.08%</b>   | <b>1.22%</b>    | <b>-1.11%</b>  | <b>-0.67%</b>   | <b>-2.51%</b>  | <b>-1.62%</b>   |
| Heilong-jiang     | 561.22         | 1476.17         | 562.48         | 1472.29         | 563.26         | 1467.34         | 559.51         | 1479.10         | 555.14         | 1475.63         |
|                   |                |                 | 0.23%          | -0.26%          | 0.36%          | -0.60%          | -0.30%         | 0.20%           | -1.08%         | -0.04%          |
| Jilin             | 233.56         | 518.85          | 239.43         | 531.35          | 245.29         | 543.85          | 227.70         | 506.35          | 221.83         | 493.85          |
|                   |                |                 | 2.51%          | 2.41%           | 5.02%          | 4.82%           | -2.51%         | -2.41%          | -5.02%         | -4.82%          |
| Liangning         | 153.37         | 347.64          | 156.34         | 353.82          | 159.33         | 360.05          | 150.39         | 341.43          | 147.39         | 335.19          |
|                   |                |                 | 1.94%          | 1.78%           | 3.88%          | 3.57%           | -1.95%         | -1.79%          | -3.90%         | -3.58%          |
| <b>China</b>      | <b>5635.28</b> | <b>13711.28</b> | <b>5724.97</b> | <b>13887.69</b> | <b>5813.35</b> | <b>14061.41</b> | <b>5544.52</b> | <b>13532.58</b> | <b>5448.68</b> | <b>13335.18</b> |
|                   |                |                 | <b>1.59%</b>   | <b>1.29%</b>    | <b>3.16%</b>   | <b>2.55%</b>    | <b>-1.61%</b>  | <b>-1.30%</b>   | <b>-3.31%</b>  | <b>-2.74%</b>   |
